# Supplementary material for: Bacterial Adaptive Memory in Methicillin-Resistant Staphylococcus aureus from Endotracheal Tubes
Source: MDPI journal article supplement (doi:10.3390/pathogens13020144), 2024-02-05
Supplement: s1 [file s1]

## Supplementary material

# Bacterial Adaptive Memory in Methicillin-Resistant *Staphylococcus aureus* from Endotracheal Tubes

Laia Fernández-Barat <sup>1,2,\*</sup>, Ruben López-Aladid <sup>1,2</sup>, Nil Vázquez <sup>1,2</sup>, Roberto Cabrera <sup>1,2</sup>, Jordi Vila <sup>2,3</sup>,  
Miquel Ferrer <sup>1,2,4</sup> and Antoni Torres <sup>1,2,4,\*</sup>

<sup>1</sup> Centro de Investigación Biomedica En Red-Enfermedades Respiratorias (CibeRes, CB06/06/0028) and Institut d'Investigacions Biomèdiques August Pi i Sunyer (IDIBAPS), 08036 Barcelona, Spain; rlopeza@recerca.clinic.cat (R.L.-A.); nvazquez@recerca.clinic.cat (N.V.); mferrer@clinic.cat (M.F.)

<sup>2</sup> University of Barcelona, 08193 Barcelona, Spain; jvila@clinic.cat

<sup>3</sup> Microbiology Service at Hospital Clinic and Institute of Global Health (ISGlobal), 08036 Barcelona, Spain

<sup>4</sup> Pulmonary and Critical Care Unit, Respiratory Institute, Hospital Clinic, 08036 Barcelona, Spain

\* Correspondence: lfernan1@recerca.clinic.cat (L.F.-B.); atorres@clinic.cat (A.T.)

**Table S1.** MRSA burden, vancomycin minimum inhibitory concentration and hours of ventilation

|           |         |   | log MRSA UFC/ml | MIC<br>Vancomycin | Hours ventilation |
|-----------|---------|---|-----------------|-------------------|-------------------|
| Treatment | Control | 1 | 4.20            | 1.50              | 58.00             |
|           |         | 2 | 4.48            | 1.50              | 58.00             |
|           |         | 3 | 3.30            | 1.50              | 72.00             |
|           |         | 4 | 5.16            | 1.50              | 72.00             |
|           |         | 5 | 0.00            | .                 | 67.00             |
|           |         | 6 | 2.18            | 1.25              | 67.00             |
|           | Vanco   | 1 | 2.00            | 1.00              | 66.00             |
|           |         | 2 | 1.00            | 1.50              | 66.00             |
|           |         | 3 | 5.08            | 1.50              | 84.00             |
|           |         | 4 | 5.85            | 1.50              | 84.00             |
|           |         | 5 | 2.41            | 1.25              | 84.00             |

Figure S1.

MRSA biofilm growth (LogCFU/mL) was registered in each day (1-4) post extubation and under both atmospheric conditions. All these results have been included in the supplementary material. Please find below the main results of this analysis, no significant differences were found between MRSA biofilm growth in CFU comparing day1-day4 between growth in ambient air (1) or ambient air+CO2 (2) as you can see below:

|                                 |           | Percentiles  |         |         |         |         |         |    |    |
|---------------------------------|-----------|--------------|---------|---------|---------|---------|---------|----|----|
|                                 |           | O2(1)_CO2(2) | 5       | 10      | 25      | 50      | 75      | 90 | 95 |
| Weighted Average (Definition 1) | MeanBDay1 | 1            | 8.6898  | 8.6898  | 9.2552  | 10.1834 | 10.9003 | .  | .  |
|                                 |           | 2            | 9.2416  | 9.2416  | 9.4546  | 10.1500 | 10.5647 | .  | .  |
|                                 | MeanBDay2 | 1            | 10.0000 | 10.0000 | 10.0548 | 10.7996 | 11.0201 | .  | .  |
|                                 |           | 2            | 10.0485 | 10.0485 | 10.2742 | 10.5779 | 11.1197 | .  | .  |
|                                 | MeanBDay3 | 1            | 10.4225 | 10.4225 | 10.6480 | 10.8838 | 11.4045 | .  | .  |
|                                 |           | 2            | 10.7870 | 10.7870 | 10.8594 | 11.0421 | 11.1094 | .  | .  |
|                                 | MeanBDay4 | 1            | 8.8580  | 8.8580  | 9.7129  | 10.1228 | 11.2517 | .  | .  |
|                                 |           | 2            | 9.3514  | 9.3514  | 9.5051  | 9.9895  | 10.6503 | .  | .  |
| Tukey's Hinges                  | MeanBDay1 | 1            |         |         | 9.4437  | 10.1834 | 10.7959 |    |    |
|                                 |           | 2            |         |         | 9.5256  | 10.1500 | 10.4454 |    |    |
|                                 | MeanBDay2 | 1            |         |         | 10.0731 | 10.7996 | 10.9404 |    |    |
|                                 |           | 2            |         |         | 10.3495 | 10.5779 | 11.0396 |    |    |
|                                 | MeanBDay3 | 1            |         |         | 10.7232 | 10.8838 | 11.1990 |    |    |
|                                 |           | 2            |         |         | 10.8836 | 11.0421 | 11.0952 |    |    |
|                                 | MeanBDay4 | 1            |         |         | 9.9978  | 10.1228 | 11.1148 |    |    |
|                                 |           | 2            |         |         | 9.5563  | 9.9895  | 10.6136 |    |    |

Figure S2.

In addition, under ambient air conditions no differences were found in MRSA biofilm growth (LogCFU/mL) between day1-day2-day3-day4 post extubation, see below:

|                              |           |
|------------------------------|-----------|
| NPar Tests                   |           |
| Friedman Test                |           |
| Ranks                        |           |
|                              | Mean Rank |
| MeanBDay1                    | 2.00      |
| MeanBDay2                    | 2.67      |
| MeanBDay3                    | 3.17      |
| MeanBDay4                    | 2.17      |
| Test Statistics <sup>a</sup> |           |
| N                            | 6         |
| Chi-Square                   | 3.000     |
| df                           | 3         |
| Asymp. Sig.                  | .392      |
| a. Friedman Test             |           |

|           |                | ANOVA          |    |             |      |      |
|-----------|----------------|----------------|----|-------------|------|------|
|           |                | Sum of Squares | df | Mean Square | F    | Sig. |
| MeanBDay1 | Between Groups | .000           | 1  | .000        | .001 | .979 |
|           | Within Groups  | 6.194          | 10 | .619        |      |      |
|           | Total          | 6.195          | 11 |             |      |      |
| MeanBDay2 | Between Groups | .001           | 1  | .001        | .002 | .963 |
|           | Within Groups  | 2.385          | 10 | .238        |      |      |
|           | Total          | 2.386          | 11 |             |      |      |
| MeanBDay3 | Between Groups | .001           | 1  | .001        | .009 | .927 |
|           | Within Groups  | 1.638          | 10 | .164        |      |      |
|           | Total          | 1.639          | 11 |             |      |      |
| MeanBDay4 | Between Groups | .218           | 1  | .218        | .343 | .571 |
|           | Within Groups  | 6.354          | 10 | .635        |      |      |
|           | Total          | 6.573          | 11 |             |      |      |

Figure S3.

Under ambient air+CO2 conditions no differences were found in MRSA biofilm growth (LogCFU/mL) between day1-day2-day3-day4 post extubation, see below:

|                              |           |
|------------------------------|-----------|
| NPar Tests                   |           |
| Friedman Test                |           |
| Ranks                        |           |
|                              | Mean Rank |
| Day 1 CFU(B)                 | 2.60      |
| Day 2 CFU(B)                 | 3.00      |
| Day 3 CFU(B)                 | 3.00      |
| Day 4 CFU(B)                 | 1.40      |
| Test Statistics <sup>a</sup> |           |
| N                            | 5         |
| Chi-Square                   | 5.160     |
| df                           | 3         |
| Asymp. Sig.                  | .160      |
| a. Friedman Test             |           |

**Figure S4.** Gene expression comparing vancomycin versus control groups under Atmospheric conditions neither Atmospheric conditions +CO2.

lcaC-O2 comparing vanco vs. control

| Test Statistics <sup>a</sup>   |                    |                   |                   |                    |
|--------------------------------|--------------------|-------------------|-------------------|--------------------|
|                                | D1Mean             | D2Mean            | D3Mean            | D4Mean             |
| Mann-Whitney U                 | 4.000              | 2.000             | 2.000             | 4.000              |
| Wilcoxon W                     | 10.000             | 8.000             | 8.000             | 10.000             |
| Z                              | -.218              | -1.091            | -1.091            | -.218              |
| Asymp. Sig. (2-tailed)         | .827               | .275              | .275              | .827               |
| Exact Sig. [2*(1-tailed Sig.)] | 1.000 <sup>b</sup> | .400 <sup>b</sup> | .400 <sup>b</sup> | 1.000 <sup>b</sup> |

a. Grouping Variable: treatrecode  
b. Not corrected for ties.

clb-O2 comparing vanco vs. control

| Test Statistics <sup>a</sup>   |                    |                   |                   |                   |
|--------------------------------|--------------------|-------------------|-------------------|-------------------|
|                                | D1Mean             | D2Mean            | D3Mean            | D4Mean            |
| Mann-Whitney U                 | 4.000              | 3.000             | 3.000             | 3.000             |
| Wilcoxon W                     | 10.000             | 9.000             | 9.000             | 9.000             |
| Z                              | -.218              | -.655             | -.655             | -.655             |
| Asymp. Sig. (2-tailed)         | .827               | .513              | .513              | .513              |
| Exact Sig. [2*(1-tailed Sig.)] | 1.000 <sup>b</sup> | .700 <sup>b</sup> | .700 <sup>b</sup> | .700 <sup>b</sup> |

a. Grouping Variable: treatrecode  
b. Not corrected for ties.

ebps-O2 comparing vanco vs. control

| Test Statistics <sup>a</sup>   |                   |                   |                   |                   |
|--------------------------------|-------------------|-------------------|-------------------|-------------------|
|                                | D1Mean            | D2Mean            | D3Mean            | D4Mean            |
| Mann-Whitney U                 | 3.000             | 3.000             | .000              | 3.000             |
| Wilcoxon W                     | 9.000             | 9.000             | 6.000             | 9.000             |
| Z                              | -.655             | -.655             | -1.964            | -.655             |
| Asymp. Sig. (2-tailed)         | .513              | .513              | .050              | .513              |
| Exact Sig. [2*(1-tailed Sig.)] | .700 <sup>b</sup> | .700 <sup>b</sup> | .100 <sup>b</sup> | .700 <sup>b</sup> |

a. Grouping Variable: treatrecode  
b. Not corrected for ties.

lcaC-CO2 comparing vanco vs. control

| Test Statistics <sup>a</sup>   |                   |                   |                   |                   |
|--------------------------------|-------------------|-------------------|-------------------|-------------------|
|                                | D1Mean            | D2Mean            | D3Mean            | D4Mean            |
| Mann-Whitney U                 | 3.000             | 1.000             | 3.000             | 3.000             |
| Wilcoxon W                     | 9.000             | 7.000             | 9.000             | 9.000             |
| Z                              | -.655             | -1.528            | -.655             | -.655             |
| Asymp. Sig. (2-tailed)         | .513              | .127              | .513              | .513              |
| Exact Sig. [2*(1-tailed Sig.)] | .700 <sup>b</sup> | .200 <sup>b</sup> | .700 <sup>b</sup> | .700 <sup>b</sup> |

a. Grouping Variable: SysTreat\_recode  
b. Not corrected for ties.

clb-CO2 comparing vanco vs. control

| Test Statistics <sup>a</sup>   |                   |                   |                   |                    |
|--------------------------------|-------------------|-------------------|-------------------|--------------------|
|                                | D1Mean            | D2Mean            | D3Mean            | D4Mean             |
| Mann-Whitney U                 | 3.000             | 2.000             | 3.000             | 4.000              |
| Wilcoxon W                     | 9.000             | 8.000             | 9.000             | 10.000             |
| Z                              | -.655             | -1.091            | -.655             | -.218              |
| Asymp. Sig. (2-tailed)         | .513              | .275              | .513              | .827               |
| Exact Sig. [2*(1-tailed Sig.)] | .700 <sup>b</sup> | .400 <sup>b</sup> | .700 <sup>b</sup> | 1.000 <sup>b</sup> |

a. Grouping Variable: SysTreat\_recode  
b. Not corrected for ties.

ebps-CO2 comparing vanco vs. control

| Test Statistics <sup>a</sup>   |                   |                   |                   |                   |
|--------------------------------|-------------------|-------------------|-------------------|-------------------|
|                                | D1Mean            | D2Mean            | D3Mean            | D4Mean            |
| Mann-Whitney U                 | 2.000             | 1.500             | .000              | 1.000             |
| Wilcoxon W                     | 8.000             | 7.500             | 6.000             | 7.000             |
| Z                              | -1.091            | -1.328            | -1.964            | -1.550            |
| Asymp. Sig. (2-tailed)         | .275              | .184              | .050              | .121              |
| Exact Sig. [2*(1-tailed Sig.)] | .400 <sup>b</sup> | .200 <sup>b</sup> | .100 <sup>b</sup> | .200 <sup>b</sup> |

a. Grouping Variable: SysTreat\_recode  
b. Not corrected for ties.

fnb-O2 comparing vanco vs. control

| Test Statistics <sup>a</sup>   |                   |                    |                   |                    |
|--------------------------------|-------------------|--------------------|-------------------|--------------------|
|                                | D1Mean            | D2Mean             | D3Mean            | D4Mean             |
| Mann-Whitney U                 | 3.000             | 4.000              | 2.000             | 4.000              |
| Wilcoxon W                     | 9.000             | 10.000             | 8.000             | 10.000             |
| Z                              | -.655             | -.218              | -1.091            | -.218              |
| Asymp. Sig. (2-tailed)         | .513              | .827               | .275              | .827               |
| Exact Sig. [2*(1-tailed Sig.)] | .700 <sup>b</sup> | 1.000 <sup>b</sup> | .400 <sup>b</sup> | 1.000 <sup>b</sup> |

a. Grouping Variable: treatrecode  
b. Not corrected for ties.

fnb-CO2 comparing vanco vs. control

| Test Statistics <sup>a</sup>   |                   |                    |                   |                   |
|--------------------------------|-------------------|--------------------|-------------------|-------------------|
|                                | D1Mean            | D2Mean             | D3Mean            | D4Mean            |
| Mann-Whitney U                 | 3.000             | 4.000              | 2.000             | 3.000             |
| Wilcoxon W                     | 9.000             | 10.000             | 8.000             | 9.000             |
| Z                              | -.655             | -.218              | -1.091            | -.655             |
| Asymp. Sig. (2-tailed)         | .513              | .827               | .275              | .513              |
| Exact Sig. [2*(1-tailed Sig.)] | .700 <sup>b</sup> | 1.000 <sup>b</sup> | .400 <sup>b</sup> | .700 <sup>b</sup> |

a. Grouping Variable: SysTreat\_recode  
b. Not corrected for ties.

RNAIII-O2 comparing vanco vs. control

| Test Statistics <sup>a</sup>   |                   |                    |                   |                    |
|--------------------------------|-------------------|--------------------|-------------------|--------------------|
|                                | D1Mean            | D2Mean             | D3Mean            | D4Mean             |
| Mann-Whitney U                 | 3.000             | 4.000              | 3.000             | 4.000              |
| Wilcoxon W                     | 9.000             | 10.000             | 9.000             | 10.000             |
| Z                              | -.655             | -.218              | -.655             | -.218              |
| Asymp. Sig. (2-tailed)         | .513              | .827               | .513              | .827               |
| Exact Sig. [2*(1-tailed Sig.)] | .700 <sup>b</sup> | 1.000 <sup>b</sup> | .700 <sup>b</sup> | 1.000 <sup>b</sup> |

a. Grouping Variable: treatrecode  
b. Not corrected for ties.

RNAIII-CO2 comparing vanco vs. control

| Test Statistics <sup>a</sup>   |                   |                   |                   |                    |
|--------------------------------|-------------------|-------------------|-------------------|--------------------|
|                                | D1Mean            | D2Mean            | D3Mean            | D4Mean             |
| Mann-Whitney U                 | 2.000             | 3.000             | 3.000             | 3.000              |
| Wilcoxon W                     | 8.000             | 9.000             | 9.000             | 6.000              |
| Z                              | -1.091            | -.655             | -.655             | .000               |
| Asymp. Sig. (2-tailed)         | .275              | .513              | .513              | 1.000              |
| Exact Sig. [2*(1-tailed Sig.)] | .400 <sup>b</sup> | .700 <sup>b</sup> | .700 <sup>b</sup> | 1.000 <sup>b</sup> |

a. Grouping Variable: SysTreat\_recode  
b. Not corrected for ties.
